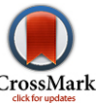

## Correction

# Correction: Identification and Chronological Analysis of Genomic Signatures in Influenza A Viruses

The *PLOS ONE* Staff

## Notice of Republication

This article was republished on March 31, 2014, due to the release of confidential or copyrighted information. The publisher apologizes for this error. Please download the article again to view the corrected version.

## Reference

1. Hu Y-J, Tu P-C, Lin C-S, Guo S-T (2014) Identification and Chronological Analysis of Genomic Signatures in Influenza A Viruses. *PLoS ONE* 9(1): e84638. doi:10.1371/journal.pone.0084638

---

**Citation:** The *PLOS ONE* Staff (2014) Correction: Identification and Chronological Analysis of Genomic Signatures in Influenza A Viruses. *PLoS ONE* 9(4): e95902. doi:10.1371/journal.pone.0095902

**Published:** April 16, 2014

**Copyright:** © 2014 The *PLOS ONE* Staff. This is an open-access article distributed under the terms of the Creative Commons Attribution License, which permits unrestricted use, distribution, and reproduction in any medium, provided the original author and source are credited.
